# Supplementary material for: Scalable fabrication of micro-sized bulk porous Si from Fe–Si alloy as a high performance anode for lithium-ion batteries
Source: Royal Society of Chemistry journal article supplement (doi:10.1039/c5ta04857e), 2015-01-01
Supplement: c5ta04857e1.pdf [file c5ta04857e1.pdf]

## Supplementary Information

# Large-scale fabrication of micro-sized bulk porous silicon as a high performance anode for lithium-ion batteries

Wei He<sup>a</sup>, Huajun Tian<sup>a\*</sup>, Fengxia Xin<sup>a</sup> and Weiqiang Han<sup>a,b\*</sup>

<sup>a</sup>*Ningbo Institute of Materials Technology and Engineering, Chinese Academy of Sciences, Ningbo 315201, P. R. China*

<sup>b</sup>*School of Physical Science and Technology, Shanghai Tech University, Shanghai200031, P. R.China*

\*Corresponding Author:

E-mail address: [tianhuajun@nimte.ac.cn](mailto:tianhuajun@nimte.ac.cn); [hanweiqiang@nimte.ac.cn](mailto:hanweiqiang@nimte.ac.cn)

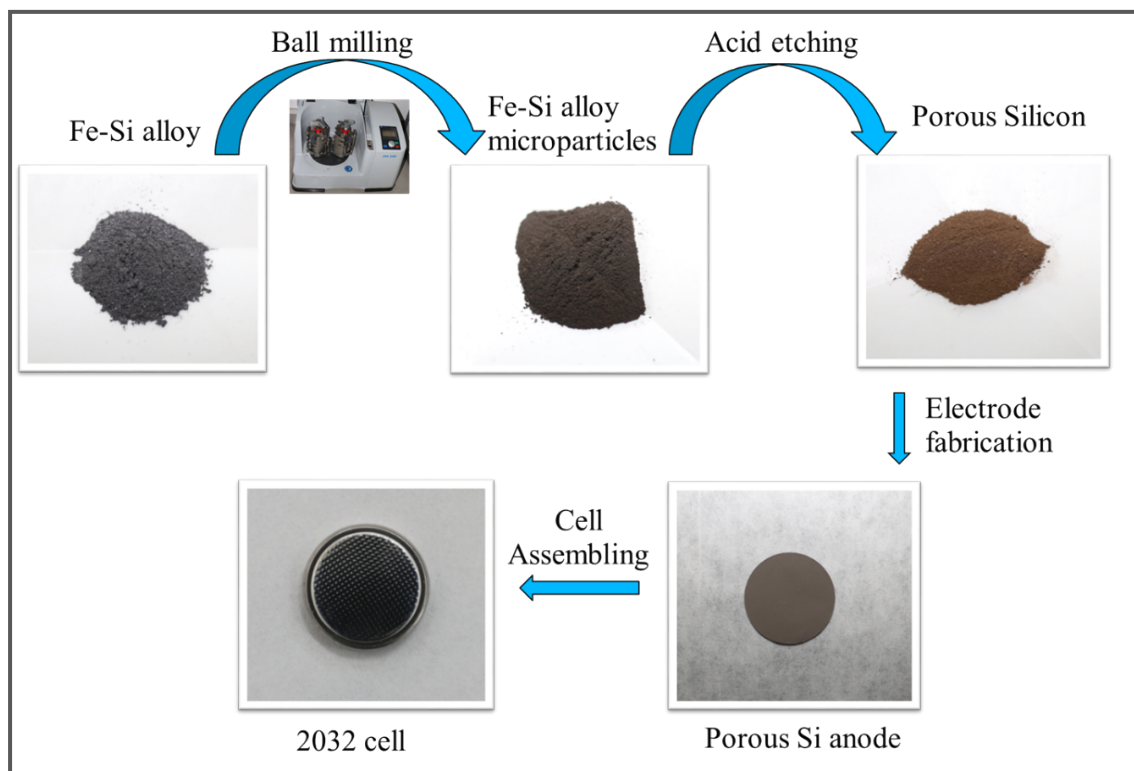

Figure S1. Schematic diagram of the synthesis and morphology of micro-sized porous Si as anode in LIBs.

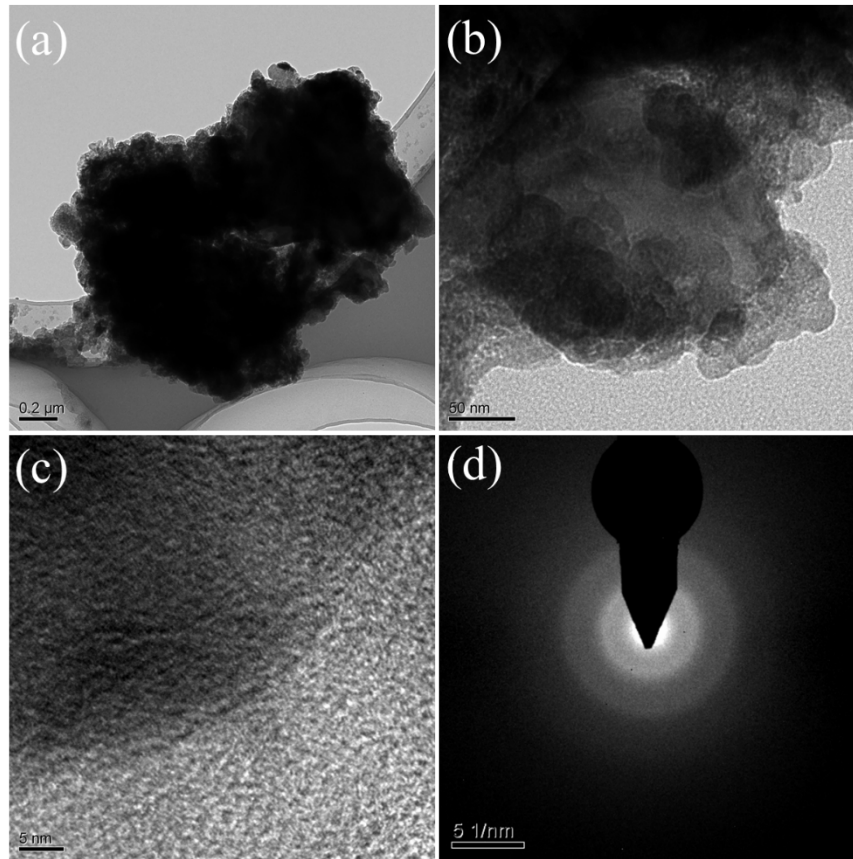

Figure S2. (a) and (b) are the TEM images of the porous Si material after 100 fully charge/discharge cycles at a current density of  $500 \text{ mA g}^{-1}$ . (c) the high-resolution TEM images, and (d) the selected area electron diffraction (SAED) of the porous Si materials after 100 cycles.

Table S1. Comparison of electrochemical performance of porous Si anodes without coating carbon in this work and in literature

| Si anodes                     | Si source                                             | Particle size                | Initial Coulombic efficiency | Capacity retention                                                          | Rate performance                                 | Ref.      |
|-------------------------------|-------------------------------------------------------|------------------------------|------------------------------|-----------------------------------------------------------------------------|--------------------------------------------------|-----------|
| Micro-sized porous silicon    | Fe-Si alloy                                           | 0.5-5 $\mu\text{m}$          | 88.1%                        | 1250 mAh g <sup>-1</sup> after 100 cycles at 500 mA g <sup>-1</sup>         | 558 mAh g <sup>-1</sup> at 5 A g <sup>-1</sup>   | this work |
| Nanocrystalline silicon       | SiCl <sub>4</sub>                                     | several tens to about 100 nm | 84.7%                        | 1180 mAh g <sup>-1</sup> after 500 cycles at 3 A g <sup>-1</sup>            | N/A                                              | 1         |
| Mesoporous SiNW               | metallurgical -Si                                     | Nano size                    | 52.9%                        | remains almost 2111 mAh g <sup>-1</sup> over 50 cycles at 0.2C              | 400 mAh g <sup>-1</sup> at 4C                    | 2         |
| Si nanorods                   | Al-Si ingot                                           | 200 nm in thickness          | 90%                          | 600 mAh g <sup>-1</sup> at 300 mA g <sup>-1</sup> over 200 cycles           | N/A                                              | 3         |
| Nano-silicon                  | SiCl <sub>4</sub> and RSiCl <sub>3</sub> (R=H, C8H17) | 5 nm                         | 90%                          | 71% capacity retention over 40 cycles                                       | N/A                                              | 4         |
| Nanoporous silicon            | Mg <sub>2</sub> Si                                    | 15 nm                        | 88%                          | 64% capacity retention over 85 cycles at 360 mA g <sup>-1</sup>             | 1000 mAh g <sup>-1</sup> at 36 A g <sup>-1</sup> | 5         |
| Nest-like silicon nanospheres | NaSi                                                  | 90-110 nm                    | N/A                          | 35.9% capacity retention over 50 cycles at 2000 mA g <sup>-1</sup>          | N/A                                              | 6         |
| Nano-silicon                  | silica sol                                            | 80 nm                        | 74%                          | 89% capacity retention over 40 cycles at 0.36 A g <sup>-1</sup>             | 350 mAh g <sup>-1</sup> at 18 A g <sup>-1</sup>  | 7         |
| Silicon nanosheets            | sand                                                  | ~5 nm                        | ~70%                         | NA                                                                          | N/A                                              | 8         |
| Porous silicon                | metallurgical Si                                      | 19 nm                        | N/A                          | retained 1400 mAh g <sup>-1</sup> at a current rate of 0.2C for 160 cycles. | N/A                                              | 9         |

|                                 |                                  |                            |       |                                                                                     |                                                          |    |
|---------------------------------|----------------------------------|----------------------------|-------|-------------------------------------------------------------------------------------|----------------------------------------------------------|----|
| Nano-Si                         | silica                           | less than 10 nm            | 64.5% | 650 mAh g <sup>-1</sup> after 55 cycles at 0.045 mA/cm <sup>2</sup>                 | N/A                                                      | 10 |
| Hollow silicon nanotube         | SiH <sub>4</sub>                 | wall thickness 60 to 80 nm | 75%   | 73% capacity retention over 400 cycles at 2A g <sup>-1</sup>                        | 1300 mAh g <sup>-1</sup> at 4 A g <sup>-1</sup>          | 11 |
| Amorphous silicon               | Silicon sputtering target        | wall thickness was ~200 nm | 82%   | 1730 mAh g <sup>-1</sup> after 200 cycles at 0.42 A g <sup>-1</sup>                 | 1480 mAh g <sup>-1</sup> at 8.4 A g <sup>-1</sup>        | 12 |
| Micrometer-sized porous silicon | SiO                              | micrometer-sized           | N/A   | 45% capacity retention after 1000 cycles                                            | N/A                                                      | 13 |
| Silicon nanowire                | C <sub>6</sub> H <sub>8</sub> Si | diameter from 10 to 50 nm  | 60%   | 54% capacity retention after 20 cycles relative to the first charging cycle at C/20 | N/A                                                      | 14 |
| Nanoscale hollow porous silicon | silica                           | 120 nm                     | 84%   | over 93% capacity retention after 99 cycles at 500 mA g <sup>-1</sup>               | over 2000 mAh g <sup>-1</sup> at 4000 mA g <sup>-1</sup> | 15 |

- (1) Lin, N.; Han, Y.; Wang, L.; Zhou, J.; Zhou, J.; Zhu, Y.; Qian, Y. *Angewandte Chemie* **2015**, *54*, 3822.
- (2) Li, X.; Yan, C.; Wang, J.; Graff, A.; Schweizer, S. L.; Sprafke, A.; Schmidt, O. G.; Wehrspohn, R. B. *Advanced Energy Materials* **2015**, *5*, n/a.
- (3) Wang, J.; Meng, X.; Fan, X.; Zhang, W.; Zhang, H.; Wang, C. *ACS Nano* **2015**.
- (4) Kim, H.; Seo, M.; Park, M. H.; Cho, J. *Angewandte Chemie* **2010**, *49*, 2146.
- (5) Liang, J. W.; Li, X. N.; Hou, Z. G.; Guo, C.; Zhu, Y. C.; Qian, Y. T. *Chemical communications* **2015**, *51*, 7230.
- (6) Ma, H.; Cheng, F.; Chen, J. Y.; Zhao, J. Z.; Li, C. S.; Tao, Z. L.; Liang, J. *Advanced materials* **2007**, *19*, 4067.
- (7) Liang, J.; Li, X.; Zhu, Y.; Guo, C.; Qian, Y. *Nano Research* **2014**, *8*, 1497.
- (8) Kim, W. S.; Hwa, Y.; Shin, J. H.; Yang, M.; Sohn, H. J.; Hong, S. H. *Nanoscale* **2014**, *6*, 4297.
- (9) Ge, M.; Lu, Y.; Ercius, P.; Rong, J.; Fang, X.; Mecklenburg, M.; Zhou, C. *Nano letters* **2014**, *14*, 261.
- (10) Liu, X.; Gao, Y.; Jin, R.; Luo, H.; Peng, P.; Liu, Y. *Nano Energy* **2014**, *4*, 31.
- (11) Epur, R.; Hanumantha, P. J.; Datta, M. K.; Hong, D.; Gattu, B.; Kumta, P. N. *Journal of Materials Chemistry A* **2015**, *3*, 11117.

- (12) Zhao, Y.; Peng, L.; Ding, Y.; Yu, G. *Chemical communications* **2014**, *50*, 12959.
- (13) Lu, Z.; Liu, N.; Lee, H.-W.; Zhao, J.; Li, W.; Li, Y.; Cui, Y. *ACS Nano* **2015**, *9*, 2540.
- (14) Chockla, A. M.; Harris, J. T.; Akhavan, V. A.; Bogart, T. D.; Holmberg, V. C.; Steinhagen, C.; Mullins, C. B.; Stevenson, K. J.; Korgel, B. A. *Journal of the American Chemical Society* **2011**, *133*, 20914.
- (15) Chen, D.; Mei, X.; Ji, G.; Lu, M.; Xie, J.; Lu, J.; Lee, J. Y. *Angew. Chem.-Int. Edit.* **2012**, *51*, 2409.
